# Supplementary material for: Safety and Tolerability of the BNT162b2 mRNA COVID-19 Vaccine in Dialyzed Patients. COViNEPH Project
Source: MDPI journal article supplement (doi:10.3390/medicina57070732), 2021-07-19
Supplement: s1 [file s1]

Form S1 Vaccine adverse effects questionnaire.

SAE 30 MINUTES AFTER VACCINATION

SOLICITED LOCAL REACTIONS

|                                         |    |      |          |        |         |
|-----------------------------------------|----|------|----------|--------|---------|
| REDNESS <sup>a</sup>                    | NO | MILD | MODERATE | SEVERE | 4 GRADE |
|                                         |    |      |          |        |         |
| SWELLING <sup>a</sup>                   | NO | MILD | MODERATE | SEVERE | 4 GRADE |
|                                         |    |      |          |        |         |
| PAIN AT THE INJECTION SITE <sup>b</sup> | NO | MILD | MODERATE | SEVERE | 4 GRADE |
|                                         |    |      |          |        |         |

<sup>a</sup>Mild: >2,0 to 5,0cm; moderate: >5,0 to 10,0cm; severe: >10,0cm; grade 4: necrosis (redness or swelling categories) or exfoliative dermatitis (redness category only)

<sup>b</sup>Mild: does not interfere with activity; moderate: some interference with activity; severe: prevents daily activity; grade 4: emergency room visit or hospitalization for severe pain at the injection site

SOLICITED SYSTEMIC REACTIONS

|                                           |          |      |          |        |         |
|-------------------------------------------|----------|------|----------|--------|---------|
| FEVER <sup>a</sup>                        | NO       | MILD | MODERATE | SEVERE | 4 GRADE |
|                                           |          |      |          |        |         |
| FATIGUE <sup>c</sup>                      | NO       | MILD | MODERATE | SEVERE | 4 GRADE |
|                                           |          |      |          |        |         |
| HEADACHE <sup>c</sup>                     | NO       | MILD | MODERATE | SEVERE | 4 GRADE |
|                                           |          |      |          |        |         |
| CHILLS <sup>c</sup>                       | NO       | MILD | MODERATE | SEVERE | 4 GRADE |
|                                           |          |      |          |        |         |
| VOMITING <sup>d</sup>                     | NO       | MILD | MODERATE | SEVERE | 4 GRADE |
|                                           |          |      |          |        |         |
| DIARRHEA <sup>e</sup>                     | NO       | MILD | MODERATE | SEVERE | 4 GRADE |
|                                           |          |      |          |        |         |
| NEW OR WORSENING MUSCLE PAIN <sup>c</sup> | NO       | MILD | MODERATE | SEVERE | 4 GRADE |
|                                           |          |      |          |        |         |
| NEW OR WORSENING JOINT PAIN <sup>c</sup>  | NO       | MILD | MODERATE | SEVERE | 4 GRADE |
|                                           |          |      |          |        |         |
| USE OF ANTYPYRETIC OR PAIN MEDICATION     | YES / NO |      |          |        |         |

<sup>a</sup>Grade 1: ≥38,0°C to 38,4°C; grade 2: 38,4°C to 38,9°C; grade 3: 38,9°C to 40,0°C, grade 4: ≥40,0°C

<sup>c</sup>Mild: does not interfere with activity; moderate: some interference with activity; severe: prevents daily activity; grade 4: emergency room visit or hospitalization for severe fatigue, severe headache, severe chills, severe muscle pain, or severe joint pain

<sup>d</sup>Mild: 1 to 2 times in 24 hours; moderate: >2 times in 24 hours; severe: requires intravenous hydration; grade 4: emergency room visit or hospitalization for severe vomiting

<sup>e</sup>Mild: 2 to 3 loose stools in 24 hours; moderate: 4 to 5 loose stools in 24 hours; severe: 6 or more loose stools in 24 hours; grade 4: emergency room visit or hospitalization for severe diarrhea

SAE, AE 30 DAYS AFTER VACCINATION

Table S1. Solicited local reactions in the study and the control group.

| LOCAL REACTIONS                               |          |                                          |                  |                                          |                  |
|-----------------------------------------------|----------|------------------------------------------|------------------|------------------------------------------|------------------|
|                                               |          | STUDY GROUP<br>(DIALYZED)                | CONTROL<br>GROUP | STUDY GROUP<br>(DIALYZED)                | CONTROL<br>GROUP |
|                                               |          | N= 189<br>n (%)                          | N= 160<br>n (%)  | N= 187<br>n (%)                          | N= 160<br>n (%)  |
|                                               |          | Adverse event after 1 <sup>st</sup> dose |                  | Adverse event after 2 <sup>nd</sup> dose |                  |
| Pain at the<br>injection<br>site <sup>a</sup> | Any      | 112 (59,3)                               | 99 (61,9)        | 113 (60,4)                               | 85 (53,1)        |
|                                               | Mild     | 99 (52,4)                                | 77 (48,1)        | 102 (54,5)                               | 63 (39,4)        |
|                                               | Moderate | 10 (5,3)                                 | 18 (11,3)        | 8 (4,3)                                  | 16 (10,0)        |
|                                               | Severe   | 3 (1,6)                                  | 4 (2,5)          | 3 (1,6)                                  | 6 (3,8)          |
| Swelling <sup>b</sup>                         | Any      | 7 (3,7) <sup>c</sup>                     | 20 (12,5)        | 2 (1,1) <sup>d</sup>                     | 22 (13,8)        |
|                                               | Mild     | 7 (3,7)                                  | 15 (9,4)         | 2 (1,1)                                  | 11 (6,9)         |
|                                               | Moderate | 0 (0,0)                                  | 5 (3,1)          | 0 (0,0)                                  | 10 (6,3)         |
|                                               | Severe   | 0 (0,0)                                  | 0 (0,0)          | 0 (0,0)                                  | 1 (0,6)          |
| Redness <sup>b</sup>                          | Any      | 5 (2,6) <sup>d</sup>                     | 19 (11,9)        | 6 (3,2) <sup>d</sup>                     | 21 (13,1)        |
|                                               | Mild     | 5 (2,6)                                  | 13 (8,1)         | 5 (2,7)                                  | 14 (8,8)         |
|                                               | Moderate | 0 (0,0)                                  | 6 (3,8)          | 1 (0,5)                                  | 7 (4,4)          |

<sup>a</sup> Mild: does not interfere with activity; moderate: some interference with activity; severe: prevents daily activity; grade 4: emergency room visit or hospitalization for severe pain at the injection site

<sup>b</sup> Mild: >2,0 to 5,0cm; moderate: >5,0 to 10,0cm; severe: >10,0cm; grade 4: necrosis (redness or swelling categories) or exfoliative dermatitis (redness category only)

Significances: (gray fields indicate statistically significant differences): <sup>c</sup> - p=0.002; <sup>d</sup> - p< 0.001

Table S2. Solicited systemic reactions in the study and the control group.

| SYSTEMIC REACTIONS                       |          |                                          |                 |                                          |                 |
|------------------------------------------|----------|------------------------------------------|-----------------|------------------------------------------|-----------------|
|                                          |          | STUDY GROUP<br>(DIALYZED)                | CONTROL GROUP   | STUDY GROUP<br>(DIALYZED)                | CONTROL GROUP   |
|                                          |          | N= 189<br>n (%)                          | N= 160<br>n (%) | N= 187<br>n (%)                          | N= 160<br>n (%) |
|                                          |          | Adverse event after 1 <sup>st</sup> dose |                 | Adverse event after 2 <sup>nd</sup> dose |                 |
| Fatigue <sup>a</sup>                     | Any      | 22 (11,6)                                | 24 (15,0)       | 42 (22,5)                                | 36 (22,5)       |
|                                          | Mild     | 20 (10,6)                                | 19 (11,9)       | 32 (17,1)                                | 28 (17,5)       |
|                                          | Moderate | 2 (1,1)                                  | 4 (2,5)         | 6 (3,2)                                  | 8 (5,0)         |
|                                          | Severe   | 0 (0,0)                                  | 1 (0,6)         | 4 (2,1)                                  | 0 (0,0)         |
| New or worsened joint pain <sup>a</sup>  | Any      | 10 (5,3)                                 | 9 (5,6)         | 20 (10,7)                                | 27 (16,9)       |
|                                          | Mild     | 7 (3,7)                                  | 6 (3,8)         | 10 (5,3)                                 | 17 (10,6)       |
|                                          | Moderate | 2 (1,1)                                  | 2 (1,3)         | 8 (4,3)                                  | 8 (5,0)         |
|                                          | Severe   | 1 (0,5)                                  | 1 (0,6)         | 2 (1,1)                                  | 2 (1,3)         |
| New or worsened muscle pain <sup>a</sup> | Any      | 9 (4,8)                                  | 12 (7,5)        | 18 (9,6) <sup>e</sup>                    | 28 (17,5)       |
|                                          | Mild     | 5 (2,6)                                  | 9 (5,6)         | 9 (4,8)                                  | 16 (10,0)       |
|                                          | Moderate | 3 (1,6)                                  | 2 (1,3)         | 8 (4,3)                                  | 8 (5,0)         |
|                                          | Severe   | 1 (0,5)                                  | 1 (0,6)         | 1 (0,5)                                  | 4 (2,5)         |
| Headache <sup>a</sup>                    | Any      | 6 (3,2)                                  | 12 (7,5)        | 12 (6,4) <sup>f</sup>                    | 22 (13,8)       |
|                                          | Mild     | 4 (2,1)                                  | 9 (5,6)         | 10 (5,3)                                 | 13 (8,1)        |
|                                          | Moderate | 1 (0,5)                                  | 2 (1,3)         | 2 (1,1)                                  | 5 (3,1)         |
|                                          | Severe   | 1 (0,5)                                  | 1 (0,6)         | 0 (0,0)                                  | 4 (2,5)         |
| Fever <sup>c</sup>                       | ≥38,0°C  | 4 (2,1)                                  | 6 (3,8)         | 13 (7,0)                                 | 14 (8,8)        |
|                                          | Grade 1  | 4 (2,1)                                  | 5 (3,1)         | 10 (5,3)                                 | 9 (5,6)         |
|                                          | Grade 2  | 0 (0,0)                                  | 1 (0,6)         | 2 (1,1)                                  | 4 (2,5)         |
|                                          | Grade 3  | 0 (0,0)                                  | 0 (0,0)         | 0 (0,0)                                  | 0 (0,0)         |
|                                          | Grade 4  | 0 (0,0)                                  | 0 (0,0)         | 0 (0,0)                                  | 1 (0,6)         |
| Chills <sup>a</sup>                      | Any      | 3 (1,6)                                  | 7 (4,4)         | 7 (3,7)                                  | 14 (8,8)        |
|                                          | Mild     | 3 (1,6)                                  | 6 (3,8)         | 5 (2,7)                                  | 7 (4,4)         |
|                                          | Moderate | 0 (0,0)                                  | 1 (0,6)         | 2 (1,1)                                  | 4 (2,5)         |
|                                          | Severe   | 0 (0,0)                                  | 0 (0,0)         | 0 (0,0)                                  | 3 (1,9)         |
| Diarrhea <sup>d</sup>                    | Any      | 1 (0,5)                                  | 0 (0,0)         | 3 (1,6)                                  | 2 (1,3)         |
|                                          | Mild     | 1 (0,5)                                  | 0 (0,0)         | 0 (0,0)                                  | 1 (0,6)         |
|                                          | Moderate | 0 (0,0)                                  | 0 (0,0)         | 3 (1,6)                                  | 0 (0,0)         |
|                                          | Severe   | 0 (0,0)                                  | 0 (0,0)         | 0 (0,0)                                  | 1 (0,6)         |
| Vomiting <sup>e</sup>                    | Any      | 0 (0,0)                                  | 0 (0,0)         | 3 (1,6)                                  | 1 (0,6)         |
|                                          | Mild     | 0 (0,0)                                  | 0 (0,0)         | 1 (0,5)                                  | 1 (0,6)         |
|                                          | Moderate | 0 (0,0)                                  | 0 (0,0)         | 2 (1,1)                                  | 0 (0,0)         |

<sup>a</sup> Mild: does not interfere with activity; moderate: some interference with activity; severe: prevents daily activity; grade 4: emergency room visit or hospitalization for severe fatigue, severe headache, severe chills, severe muscle pain, or severe joint pain

<sup>c</sup> Grade 1: ≥38,0°C to 38,4°C; grade 2: 38,4°C to 38,9°C; grade 3: 38,9°C to 40,0°C, grade 4: ≥40,0°C

<sup>d</sup> Mild: 2 to 3 loose stools in 24 hours; moderate: 4 to 5 loose stools in 24 hours; severe: 6 or more loose stools in 24 hours; grade 4: emergency room visit or hospitalization for severe diarrhea <sup>e</sup>

Mild: 1 to 2 times in 24 hours; moderate: >2 times in 24 hours; severe: requires intravenous hydration; grade 4: emergency room visit or hospitalization for severe vomiting

Significances: (gray fields indicate statistically significant differences): <sup>e</sup> - p=0.038; <sup>f</sup> - p= 0.028.

Table S3. Solicited local reactions in subgroups according to age

| LOCAL REACTIONS                         |           |                                          |                        |                         |                        |                                          |                        |                         |                        |
|-----------------------------------------|-----------|------------------------------------------|------------------------|-------------------------|------------------------|------------------------------------------|------------------------|-------------------------|------------------------|
|                                         |           | STUDY GROUP<br>(DIALYZED)                |                        | CONTROL GROUP           |                        | STUDY GROUP<br>(DIALYZED)                |                        | CONTROL GROUP           |                        |
|                                         |           | 18-55<br>N= 48<br>n (%)                  | >55<br>N= 141<br>n (%) | 18-55<br>N= 50<br>n (%) | >55<br>N= 110<br>n (%) | 18-55<br>N= 48<br>n (%)                  | >55<br>N= 139<br>n (%) | 18-55<br>N= 50<br>n (%) | >55<br>N= 110<br>n (%) |
|                                         |           | Adverse event after 1 <sup>st</sup> dose |                        |                         |                        | Adverse event after 2 <sup>nd</sup> dose |                        |                         |                        |
| Pain at the injection site <sup>a</sup> | Any       | 42(87,5) <sup>c</sup>                    | 70 (49,6)              | 37(74,0) <sup>d</sup>   | 62 (56,4)              | 38(79,2) <sup>c</sup>                    | 75 (54,0)              | 31 (62,0)               | 54 (49,1)              |
|                                         | Mild      | 35 (72,9)                                | 64 (45,4)              | 24 (48,0)               | 53 (48,2)              | 35 (72,9)                                | 67 (48,2)              | 20 (40,0)               | 43 (39,1)              |
|                                         | Moderate  | 4 (8,3)                                  | 6 (4,3)                | 11 (22,0)               | 7 (6,4)                | 1 (2,1)                                  | 7 (5,0)                | 8 (16,0)                | 8 (7,3)                |
|                                         | Severe    | 3 (6,3)                                  | 0 (0,0)                | 2 (4,0)                 | 2 (1,8)                | 2 (4,2)                                  | 1 (0,7)                | 3 (6,0)                 | 3 (2,7)                |
| Swelling <sup>b</sup>                   | Any       | 3 (6,3)                                  | 4 (2,8)                | 7 (14,0)                | 13 (11,8)              | 0 (0,0)                                  | 2 (1,4)                | 11 (22,0)               | 11 (10,0)              |
|                                         | Mild      | 3 (6,3)                                  | 4 (2,8)                | 5 (10,0)                | 10 (9,1)               | 0 (0,0)                                  | 2 (1,4)                | 5 (10,0)                | 6 (5,5)                |
|                                         | Moderate  | 0 (0,0)                                  | 0 (0,0)                | 2 (4,0)                 | 3 (2,7)                | 0 (0,0)                                  | 0 (0,0)                | 5 (10,0)                | 5 (4,5)                |
|                                         | Severe    | 0 (0,0)                                  | 0 (0,0)                | 0 (0,0)                 | 0 (0,0)                | 0 (0,0)                                  | 0 (0,0)                | 1 (2,0)                 | 0 (0,0)                |
|                                         | 4th grade | 0 (0,0)                                  | 0 (0,0)                | 0 (0,0)                 | 0 (0,0)                | 0 (0,0)                                  | 0 (0,0)                | 0 (0,0)                 | 0 (0,0)                |
| Redness <sup>b</sup>                    | Any       | 2 (4,2)                                  | 3 (2,1)                | 7 (14,0)                | 12 (10,9)              | 1 (2,1)                                  | 5 (3,6)                | 9 (18,0)                | 12 (10,9)              |
|                                         | Mild      | 2 (4,2)                                  | 3 (2,1)                | 4 (8,0)                 | 9 (8,2)                | 1 (2,1)                                  | 4 (2,9)                | 5 (10,0)                | 9 (8,2)                |
|                                         | Moderate  | 0 (0,0)                                  | 0 (0,0)                | 3 (6,0)                 | 3 (2,7)                | 0 (0,0)                                  | 1 (0,7)                | 4 (8,0)                 | 3 (2,7)                |

<sup>a</sup> Mild: does not interfere with activity; moderate: some interference with activity; severe: prevents daily activity; grade 4: emergency room visit or hospitalization for severe pain at the injection site

<sup>b</sup> Mild: >2,0 to 5,0cm; moderate: >5,0 to 10,0cm; severe: >10,0cm; grade 4: necrosis (redness or swelling categories) or exfoliative dermatitis (redness category only)

Significances: (gray fields indicate statistically significant differences): <sup>c</sup> -p<0.001; <sup>d</sup> - p=0.033; <sup>e</sup> - p=0.002.

Table S4. Solicited systemic reactions in subgroups according to age

| SYSTEMIC REACTIONS                       |          |                         |                        |                         |                                          |                         |                        |                         |                        |
|------------------------------------------|----------|-------------------------|------------------------|-------------------------|------------------------------------------|-------------------------|------------------------|-------------------------|------------------------|
|                                          |          | STUDY GROUP (DIALYZED)  |                        | CONTROL GROUP           |                                          | STUDY GROUP (DIALYZED)  |                        | CONTROL GROUP           |                        |
|                                          |          | 18-55<br>N= 48<br>n (%) | >55<br>N= 141<br>n (%) | 18-55<br>N= 50<br>n (%) | >55<br>N= 110<br>n (%)                   | 18-55<br>N= 48<br>n (%) | >55<br>N= 139<br>n (%) | 18-55<br>N= 50<br>n (%) | >55<br>N= 110<br>n (%) |
| Adverse event after 1 <sup>st</sup> dose |          |                         |                        |                         | Adverse event after 2 <sup>nd</sup> dose |                         |                        |                         |                        |
| Fatigue <sup>a</sup>                     | Any      | 9 (18,8)                | 13 (9,2)               | 13(26,0) <sup>e</sup>   | 11 (10,0)                                | 13 (27,1)               | 29 (20,9)              | 15 (30,0)               | 21 (19,1)              |
|                                          | Mild     | 8 (16,7)                | 12 (8,5)               | 11 (22,0)               | 8 (7,3)                                  | 10 (20,8)               | 22 (15,8)              | 10 (20,0)               | 18 (16,4)              |
|                                          | Moderate | 1 (2,1)                 | 1 (0,7)                | 2 (4,0)                 | 2 (1,8)                                  | 3 (6,3)                 | 3 (2,2)                | 5 (10,0)                | 3 (2,7)                |
|                                          | Severe   | 0 (0,0)                 | 0 (0,0)                | 0 (0,0)                 | 1 (0,9)                                  | 0 (0,0)                 | 4 (2,9)                | 0 (0,0)                 | 0 (0,0)                |
| New or worsened joint pain <sup>a</sup>  | Any      | 2 (4,2)                 | 8 (5,7)                | 7 (14,0) <sup>f</sup>   | 2 (1,8)                                  | 10(20,8) <sup>i</sup>   | 10 (7,2)               | 15(30,0) <sup>k</sup>   | 12 (10,9)              |
|                                          | Mild     | 1 (2,1)                 | 6 (4,3)                | 4 (8,0)                 | 2 (1,8)                                  | 5 (10,4)                | 5 (3,6)                | 9 (18,0)                | 8 (7,3)                |
|                                          | Moderate | 1 (2,1)                 | 1 (0,7)                | 2 (4,0)                 | 0 (0,0)                                  | 5 (10,4)                | 3 (2,2)                | 5 (10,0)                | 3 (2,7)                |
|                                          | Severe   | 0 (0,0)                 | 1 (0,7)                | 1 (2,0)                 | 0 (0,0)                                  | 0 (0,0)                 | 2 (1,4)                | 1 (2,0)                 | 1 (0,9)                |
| New or worsened muscle pain <sup>a</sup> | Any      | 3 (6,3)                 | 6 (4,3)                | 8 (16,0) <sup>g</sup>   | 4 (3,6)                                  | 10(20,8) <sup>g</sup>   | 8 (5,8)                | 15 (30,0) <sup>l</sup>  | 13 (11,8)              |
|                                          | Mild     | 1 (2,1)                 | 4 (2,8)                | 6 (12,0)                | 3 (2,7)                                  | 5 (10,4)                | 4 (2,9)                | 8 (16,0)                | 8 (7,3)                |
|                                          | Moderate | 2 (4,2)                 | 1 (0,7)                | 1 (2,0)                 | 1 (0,9)                                  | 5 (10,4)                | 3 (2,2)                | 5 (10,0)                | 3 (2,7)                |
|                                          | Severe   | 0 (0,0)                 | 1 (0,7)                | 1 (2,0)                 | 0 (0,0)                                  | 0 (0,0)                 | 1 (0,7)                | 2 (4,0)                 | 2 (1,8)                |
| Headache <sup>a</sup>                    | Any      | 1 (2,1)                 | 5 (3,5)                | 7 (14,0) <sup>h</sup>   | 5 (4,5)                                  | 5 (10,4)                | 7 (5,0)                | 12(24,0) <sup>m</sup>   | 10 (9,1)               |
|                                          | Mild     | 1 (2,1)                 | 3 (2,1)                | 5 (10,0)                | 4 (3,6)                                  | 5 (10,4)                | 5 (3,6)                | 8 (16,0)                | 5 (4,5)                |
|                                          | Moderate | 0 (0,0)                 | 1 (0,7)                | 1 (2,0)                 | 1 (0,9)                                  | 0 (0,0)                 | 2 (1,4)                | 3 (6,0)                 | 2 (1,8)                |
|                                          | Severe   | 0 (0,0)                 | 1 (0,7)                | 1 (2,0)                 | 0 (0,0)                                  | 0 (0,0)                 | 0 (0,0)                | 1 (2,0)                 | 3 (2,7)                |
| Fever <sup>c</sup>                       | ≥38,0°C  | 1 (2,1)                 | 3 (2,1)                | 3 (6,0)                 | 3 (2,7)                                  | 7 (14,6) <sup>j</sup>   | 6 (4,3)                | 5 (10,0)                | 9 (8,2)                |
|                                          | Grade 1  | 1 (2,1)                 | 3 (2,1)                | 3 (6,0)                 | 2 (1,8)                                  | 5 (10,4)                | 5 (3,6)                | 3 (6,0)                 | 6 (5,5)                |
|                                          | Grade 2  | 0 (0,0)                 | 0 (0,0)                | 0 (0,0)                 | 1 (0,9)                                  | 1 (2,1)                 | 1 (0,7)                | 1 (2,0)                 | 3 (2,7)                |
|                                          | Grade 3  | 0 (0,0)                 | 0 (0,0)                | 0 (0,0)                 | 0 (0,0)                                  | 1 (2,1)                 | 0 (0,0)                | 0 (0,0)                 | 0 (0,0)                |
|                                          | Grade 4  | 0 (0,0)                 | 0 (0,0)                | 0 (0,0)                 | 0 (0,0)                                  | 0 (0,0)                 | 0 (0,0)                | 1 (2,0)                 | 0 (0,0)                |
| Chills <sup>a</sup>                      | Any      | 3 (6,3)                 | 0 (0,0)                | 3 (6,0)                 | 4 (3,6)                                  | 4 (8,3)                 | 3 (2,2)                | 5 (10,0)                | 9 (8,2)                |
|                                          | Mild     | 3 (6,3)                 | 0 (0,0)                | 3 (6,0)                 | 3 (2,7)                                  | 3 (6,3)                 | 2 (1,4)                | 3 (6,0)                 | 4 (3,6)                |
|                                          | Moderate | 0 (0,0)                 | 0 (0,0)                | 0 (0,0)                 | 1 (0,9)                                  | 1 (2,1)                 | 1 (0,7)                | 1 (2,0)                 | 3 (2,7)                |
|                                          | Severe   | 0 (0,0)                 | 0 (0,0)                | 0 (0,0)                 | 0 (0,0)                                  | 0 (0,0)                 | 0 (0,0)                | 1 (2,0)                 | 2 (1,8)                |
| Diarrhea <sup>d</sup>                    | Any      | 0 (0,0)                 | 1 (0,7)                | 0 (0,0)                 | 0 (0,0)                                  | 1 (2,1)                 | 2 (1,4)                | 1 (2,0)                 | 1 (0,9)                |
|                                          | Mild     | 0 (0,0)                 | 1 (0,7)                | 0 (0,0)                 | 0 (0,0)                                  | 0 (0,0)                 | 0 (0,0)                | 0 (0,0)                 | 1 (0,9)                |
|                                          | Moderate | 0 (0,0)                 | 0 (0,0)                | 0 (0,0)                 | 0 (0,0)                                  | 1 (2,1)                 | 2 (1,4)                | 0 (0,0)                 | 0 (0,0)                |
|                                          | Severe   | 0 (0,0)                 | 0 (0,0)                | 0 (0,0)                 | 0 (0,0)                                  | 0 (0,0)                 | 0 (0,0)                | 1 (2,0)                 | 0 (0,0)                |
| Vomiting <sup>e</sup>                    | Any      | 0 (0,0)                 | 0 (0,0)                | 0 (0,0)                 | 0 (0,0)                                  | 1 (2,1)                 | 2 (1,4)                | 0 (0,0)                 | 1 (0,9)                |
|                                          | Mild     | 0 (0,0)                 | 0 (0,0)                | 0 (0,0)                 | 0 (0,0)                                  | 1 (2,1)                 | 0 (0,0)                | 0 (0,0)                 | 1 (0,9)                |
|                                          | Moderate | 0 (0,0)                 | 0 (0,0)                | 0 (0,0)                 | 0 (0,0)                                  | 0 (0,0)                 | 2 (1,4)                | 0 (0,0)                 | 0 (0,0)                |

<sup>a</sup> Mild: does not interfere with activity; moderate: some interference with activity; severe: prevents daily activity; grade 4: emergency room visit or hospitalization for severe fatigue, severe headache, severe chills, severe muscle pain, or severe joint pain

<sup>c</sup> Grade 1: ≥38,0°C to 38,4°C; grade 2: 38,4°C to 38,9°C; grade 3: 38,9°C to 40,0°C, grade 4: ≥40,0°C

<sup>d</sup> Mild: 2 to 3 loose stools in 24 hours; moderate: 4 to 5 loose stools in 24 hours; severe: 6 or more loose stools in 24 hours; grade 4: emergency room visit or hospitalization for severe diarrhea

Mild: 1 to 2 times in 24 hours; moderate: >2 times in 24 hours; severe: requires intravenous hydration; grade 4: emergency room visit or hospitalization for severe vomiting.

Significances: (gray fields indicate statistically significant differences): <sup>e</sup> -p=0.009; <sup>f</sup> - p=0.002; <sup>g</sup> - p=0.006;

<sup>h</sup> - p=0.035; <sup>i</sup> - p=0.008; <sup>j</sup> - p=0.016; <sup>k</sup> - p=0.003; <sup>l</sup> - p=0.005; <sup>m</sup> - p=0.01.

Table S5. Solicited local reactions in subgroups according to gender.

| LOCAL REACTIONS                               |          |                                          |                         |                          |                        |                                          |                         |                          |                        |
|-----------------------------------------------|----------|------------------------------------------|-------------------------|--------------------------|------------------------|------------------------------------------|-------------------------|--------------------------|------------------------|
|                                               |          | STUDY GROUP<br>(DIALYZED)                |                         | CONTROL GROUP            |                        | STUDY GROUP<br>(DIALYZED)                |                         | CONTROL GROUP            |                        |
|                                               |          | Female<br>N= 66<br>n (%)                 | Male<br>N= 123<br>n (%) | Female<br>N= 63<br>n (%) | Male<br>N= 97<br>n (%) | Female<br>N= 65<br>n (%)                 | Male<br>N= 122<br>n (%) | Female<br>N= 63<br>n (%) | Male<br>N= 97<br>n (%) |
|                                               |          | Adverse event after 1 <sup>st</sup> dose |                         |                          |                        | Adverse event after 2 <sup>nd</sup> dose |                         |                          |                        |
| Pain at the<br>injection<br>site <sup>a</sup> | Any      | 43 (65,2)                                | 69 (56,1)               | 47(74,6) <sup>c</sup>    | 52 (53,6)              | 44 (67,7)                                | 69 (56,6)               | 43(68,3) <sup>d</sup>    | 42 (43,3)              |
|                                               | Mild     | 34 (51,5)                                | 65 (52,8)               | 37 (58,7)                | 40 (41,2)              | 39 (60,0)                                | 63 (51,6)               | 29 (46,0)                | 34 (35,1)              |
|                                               | Moderate | 6 (9,1)                                  | 4 (3,3)                 | 9 (14,3)                 | 9 (9,3)                | 3 (4,6)                                  | 5 (4,1)                 | 11 (17,5)                | 5 (5,2)                |
|                                               | Severe   | 3 (4,5)                                  | 0 (0,0)                 | 1 (1,6)                  | 3 (3,1)                | 2 (3,1)                                  | 1 (0,8)                 | 3 (4,8)                  | 3 (3,1)                |
| Swelling <sup>b</sup>                         | Any      | 2 (3,0)                                  | 5 (4,1)                 | 18 (28,6)                | 4 (4,1)                | 0 (0,0)                                  | 2 (1,6)                 | 19 (30,2)                | 3 (3,1)                |
|                                               | Mild     | 2 (3,0)                                  | 5 (4,1)                 | 14 (22,2)                | 3 (3,1)                | 0 (0,0)                                  | 2 (1,6)                 | 10 (15,9)                | 1 (1,0)                |
|                                               | Moderate | 0 (0,0)                                  | 0 (0,0)                 | 4 (6,3)                  | 1 (1,0)                | 0 (0,0)                                  | 0 (0,0)                 | 9 (14,3)                 | 1 (1,0)                |
|                                               | Severe   | 0 (0,0)                                  | 0 (0,0)                 | 0 (0,0)                  | 0 (0,0)                | 0 (0,0)                                  | 0 (0,0)                 | 0 (0,0)                  | 1 (1,0)                |
| Redness <sup>b</sup>                          | Any      | 1 (1,5)                                  | 4 (3,3)                 | 15 (23,8)                | 4 (4,1)                | 2 (3,1)                                  | 4 (3,3)                 | 19 (30,2)                | 2 (2,1)                |
|                                               | Mild     | 1 (1,5)                                  | 4 (3,3)                 | 10 (15,9)                | 3 (3,1)                | 1 (1,5)                                  | 4 (3,3)                 | 12 (19,0)                | 2 (2,1)                |
|                                               | Moderate | 0 (0,0)                                  | 0 (0,0)                 | 5 (7,9)                  | 1 (1,0)                | 1 (1,5)                                  | 0 (0,0)                 | 7 (11,1)                 | 0 (0,0)                |

<sup>a</sup> Mild: does not interfere with activity; moderate: some interference with activity; severe: prevents daily activity;  
grade 4: emergency room visit or hospitalization for severe pain at the injection site

<sup>b</sup> Mild: >2,0 to 5,0cm; moderate: >5,0 to 10,0cm; severe: >10,0cm; grade 4: necrosis (redness or swelling categories) or exfoliative dermatitis (redness category only)

Significances: (gray fields indicate statistically significant differences): <sup>c</sup> -p=0.008; <sup>d</sup> - p=0.002.

Table S6. Solicited systemic reactions in subgroups according to gender.

| SYSTEMIC REACTIONS                       |          |                                          |                         |                          |                        |                                          |                         |                          |                        |
|------------------------------------------|----------|------------------------------------------|-------------------------|--------------------------|------------------------|------------------------------------------|-------------------------|--------------------------|------------------------|
|                                          |          | STUDY GROUP<br>(DIALYZED)                |                         | CONTROL GROUP            |                        | STUDY GROUP<br>(DIALYZED)                |                         | CONTROL GROUP            |                        |
|                                          |          | Female<br>N= 66<br>n (%)                 | Male<br>N= 123<br>n (%) | Female<br>N= 63<br>n (%) | Male<br>N= 97<br>n (%) | Female<br>N= 65<br>n (%)                 | Male<br>N= 122<br>n (%) | Female<br>N= 63<br>n (%) | Male<br>N= 97<br>n (%) |
|                                          |          | Adverse event after 1 <sup>st</sup> dose |                         |                          |                        | Adverse event after 2 <sup>nd</sup> dose |                         |                          |                        |
| Fatigue <sup>a</sup>                     | Any      | 8 (12,1)                                 | 14 (11,4)               | 19 (30,2)                | 5 (5,2)                | 22(33,8) <sup>f</sup>                    | 20 (16,4)               | 24(38,1) <sup>f</sup>    | 12 (12,4)              |
|                                          | Mild     | 7 (10,6)                                 | 13 (10,6)               | 14 (22,2)                | 5 (5,2)                | 19 (29,2)                                | 13 (10,7)               | 20 (31,7)                | 8 (8,2)                |
|                                          | Moderate | 1 (1,5)                                  | 1 (0,8)                 | 4 (6,3)                  | 0 (0,0)                | 2 (3,1)                                  | 4 (3,3)                 | 4 (6,3)                  | 4 (4,1)                |
|                                          | Severe   | 0 (0,0)                                  | 0 (0,0)                 | 1 (1,6)                  | 0 (0,0)                | 1 (1,5)                                  | 3 (2,5)                 | 0 (0,0)                  | 0 (0,0)                |
| New or worsened joint pain <sup>a</sup>  | Any      | 6 (9,1)                                  | 4 (3,3)                 | 7 (11,1)                 | 2 (2,1)                | 15(23,1) <sup>g</sup>                    | 5 (4,1)                 | 17(27,0) <sup>j</sup>    | 10 (10,3)              |
|                                          | Mild     | 4 (6,1)                                  | 3 (2,4)                 | 5 (7,9)                  | 1 (1,0)                | 6 (9,2)                                  | 4 (3,3)                 | 10 (15,9)                | 7 (7,2)                |
|                                          | Moderate | 1 (1,5)                                  | 1 (0,8)                 | 2 (3,2)                  | 0 (0,0)                | 7 (10,8)                                 | 1 (0,8)                 | 6 (9,5)                  | 2 (2,1)                |
|                                          | Severe   | 1 (1,5)                                  | 0 (0,0)                 | 0 (0,0)                  | 1 (1,0)                | 2 (3,1)                                  | 0 (0,0)                 | 1 (1,6)                  | 1 (1,0)                |
| New or worsened muscle pain <sup>a</sup> | Any      | 6 (9,1)                                  | 3 (2,4)                 | 9 (14,3)                 | 3 (3,1)                | 13(20,0) <sup>h</sup>                    | 5 (4,1)                 | 18(28,6) <sup>i</sup>    | 10 (10,3)              |
|                                          | Mild     | 3 (4,5)                                  | 2 (1,6)                 | 7 (11,1)                 | 2 (2,1)                | 5 (7,7)                                  | 4 (3,3)                 | 10 (15,9)                | 6 (6,2)                |
|                                          | Moderate | 2 (3,0)                                  | 1 (0,8)                 | 2 (3,2)                  | 0 (0,0)                | 7 (10,8)                                 | 1 (0,8)                 | 6 (9,5)                  | 2 (2,1)                |
|                                          | Severe   | 1 (1,5)                                  | 0 (0,0)                 | 0 (0,0)                  | 1 (1,0)                | 1 (1,5)                                  | 0 (0,0)                 | 2 (3,2)                  | 2 (2,1)                |
| Headache <sup>a</sup>                    | Any      | 4 (6,1)                                  | 2 (1,6)                 | 8 (12,7)                 | 4 (4,1)                | 7 (10,8)                                 | 5 (4,1)                 | 16(25,4) <sup>g</sup>    | 6 (6,2)                |
|                                          | Mild     | 3 (4,5)                                  | 1 (0,8)                 | 5 (7,9)                  | 4 (4,1)                | 7 (10,8)                                 | 3 (2,5)                 | 9 (14,3)                 | 4 (4,1)                |
|                                          | Moderate | 0 (0,0)                                  | 1 (0,80)                | 2 (3,2)                  | 0 (0,0)                | 0 (0,0)                                  | 2 (1,6)                 | 4 (6,3)                  | 1 (1,0)                |
|                                          | Severe   | 1 (1,5)                                  | 0 (0,0)                 | 1 (1,6)                  | 0 (0,0)                | 0 (0,0)                                  | 0 (0,0)                 | 3 (4,8)                  | 1 (1,0)                |
| Fever <sup>c</sup>                       | ≥38,0°C  | 2 (3,0)                                  | 2 (1,6)                 | 2 (3,2)                  | 4 (4,1)                | 6 (9,2)                                  | 7 (5,7)                 | 7 (11,1)                 | 7 (7,2)                |
|                                          | Grade 1  | 2 (3,0)                                  | 2 (1,6)                 | 2 (3,2)                  | 3 (3,1)                | 5 (7,7)                                  | 5 (4,1)                 | 5 (7,9)                  | 4 (4,1)                |
|                                          | Grade 2  | 0 (0,0)                                  | 0 (0,0)                 | 0 (0,0)                  | 1 (1,0)                | 1 (1,5)                                  | 1 (0,8)                 | 2 (3,2)                  | 2 (2,1)                |
|                                          | Grade 3  | 0 (0,0)                                  | 0 (0,0)                 | 0 (0,0)                  | 0 (0,0)                | 0 (0,0)                                  | 1 (0,8)                 | 0 (0,0)                  | 0 (0,0)                |
|                                          | Grade 4  | 0 (0,0)                                  | 0 (0,0)                 | 0 (0,0)                  | 0 (0,0)                | 0 (0,0)                                  | 0 (0,0)                 | 0 (0,0)                  | 1 (1,0)                |
| Chills <sup>a</sup>                      | Any      | 3 (4,5)                                  | 0 (0,0)                 | 5 (7,9)                  | 2 (2,1)                | 5 (7,7) <sup>l</sup>                     | 2 (1,6)                 | 11(17,5) <sup>k</sup>    | 3 (3,1)                |
|                                          | Mild     | 3 (4,5)                                  | 0 (0,0)                 | 4 (6,3)                  | 2 (2,1)                | 4 (6,2)                                  | 1 (0,8)                 | 5 (7,9)                  | 2 (2,1)                |
|                                          | Moderate | 0 (0,0)                                  | 0 (0,0)                 | 1 (1,6)                  | 0 (0,0)                | 1 (1,5)                                  | 1 (0,8)                 | 4 (6,3)                  | 0 (0,0)                |
|                                          | Severe   | 0 (0,0)                                  | 0 (0,0)                 | 0 (0,0)                  | 0 (0,0)                | 0 (0,0)                                  | 0 (0,0)                 | 2 (3,2)                  | 1 (1,0)                |
| Diarrhea <sup>d</sup>                    | Any      | 1 (1,5)                                  | 0 (0,0)                 | 0 (0,0)                  | 0 (0,0)                | 0 (0,0)                                  | 3 (2,5)                 | 1 (1,6)                  | 1 (1,0)                |
|                                          | Mild     | 1 (1,5)                                  | 0 (0,0)                 | 0 (0,0)                  | 0 (0,0)                | 0 (0,0)                                  | 0 (0,0)                 | 1 (1,6)                  | 0 (0,0)                |
|                                          | Moderate | 0 (0,0)                                  | 0 (0,0)                 | 0 (0,0)                  | 0 (0,0)                | 0 (0,0)                                  | 3 (2,5)                 | 0 (0,0)                  | 0 (0,0)                |
|                                          | Severe   | 0 (0,0)                                  | 0 (0,0)                 | 0 (0,0)                  | 0 (0,0)                | 0 (0,0)                                  | 0 (0,0)                 | 0 (0,0)                  | 1 (1,0)                |
| Vomiting <sup>e</sup>                    | Any      | 0 (0,0)                                  | 0 (0,0)                 | 0 (0,0)                  | 0 (0,0)                | 1 (1,5)                                  | 2 (1,6)                 | 0 (0,0)                  | 1 (1,0)                |
|                                          | Mild     | 0 (0,0)                                  | 0 (0,0)                 | 0 (0,0)                  | 0 (0,0)                | 1 (1,5)                                  | 0 (0,0)                 | 0 (0,0)                  | 1 (1,0)                |
|                                          | Moderate | 0 (0,0)                                  | 0 (0,0)                 | 0 (0,0)                  | 0 (0,0)                | 0 (0,0)                                  | 2 (1,6)                 | 0 (0,0)                  | 0 (0,0)                |

<sup>a</sup> Mild: does not interfere with activity; moderate: some interference with activity; severe: prevents daily activity; grade 4: emergency room visit or hospitalization for severe fatigue, severe headache, severe chills, severe muscle pain, or severe joint pain

<sup>c</sup> Grade 1: ≥38,0°C to 38,4°C; grade 2: 38,4°C to 38,9°C; grade 3: 38,9°C to 40,0°C, grade 4: ≥40,0°C

<sup>d</sup> Mild: 2 to 3 loose stools in 24 hours; moderate: 4 to 5 loose stools in 24 hours; severe: 6 or more loose stools in 24 hours; grade 4: emergency room visit or hospitalization for severe diarrhea

<sup>e</sup> Mild: 1 to 2 times in 24 hours; moderate: >2 times in 24 hours; severe: requires intravenous hydration; grade 4: emergency room visit or hospitalization for severe vomiting

Significances: (gray fields indicate statistically significant differences): <sup>f</sup>-p=0.009; <sup>g</sup>- p<0.001; <sup>h</sup>- p=0.004;

<sup>i</sup>- p=0.003; <sup>j</sup>- p=0.006; <sup>k</sup>- p=0.002; <sup>l</sup>- p=0.037.
